# Supplementary material for: Antibody binding reports spatial heterogeneities in cell membrane organization
Source: PubMed Central journal article supplement (PMC10199101; doi:10.1038/s41467-023-38525-2), 2023-05-20
Supplement: 41467_2023_38525_MOESM3_ESM.pdf [file 41467_2023_38525_MOESM3_ESM.pdf]

**File name: Supplementary Movie 1**

**Description:** MD simulation of FITC sensor (green) with 64 linker monomer units (blue), each of diameter 0.33 nm. Sensors were tethered to the bottom of the simulation box at a surface density of  $1000/\mu\text{m}^2$ .

**File name: Supplementary Movie 2**

**Description:** MD simulations of antibodies in monodisperse PEG surface. MD simulation of ideal gas antibodies (red) of diameter 4 nm and  $N = 45$  PEG brush (gray) with monomer diameter 0.33 nm and surface density of  $30000/\mu\text{m}^2$ .

**File name: Supplementary Movie 3**

**Description:** MD simulation of antibodies in bidisperse red blood cell surface. MD simulation of ideal gas antibodies (red) of diameter 11 nm in the presence of a bidisperse brush. Glycophorin A (dark green) is represented as a seven-bead chain with monomer diameter 2 nm and surface density of  $1300/\mu\text{m}^2$ , while Band 3 (light green) is represented as a 10 bead chain with monomer diameter 1 nm and surface density of  $6700/\mu\text{m}^2$ .
